# Supplementary material for: COVID-19 Knowledge, Attitudes, and Vaccine Hesitancy in Ethiopia: A Community-Based Cross-Sectional Study
Source: MDPI journal article supplement (doi:10.3390/vaccines11040774), 2023-03-31
Supplement: s1 [file s1]

## A Study on COVID 19 Vaccine Hesitancy

| Section 1. Informed Consent |                                                                                                                                                                                                                                                                                                                                                                                                                                                                                                                                                                                                                                                                                                                                                                                                                                                                                                                                                                                                                                                                                                                                                                                                                                                                                                                                                                                                                                                                                                                                                    |                                                                 |     |  |
|-----------------------------|----------------------------------------------------------------------------------------------------------------------------------------------------------------------------------------------------------------------------------------------------------------------------------------------------------------------------------------------------------------------------------------------------------------------------------------------------------------------------------------------------------------------------------------------------------------------------------------------------------------------------------------------------------------------------------------------------------------------------------------------------------------------------------------------------------------------------------------------------------------------------------------------------------------------------------------------------------------------------------------------------------------------------------------------------------------------------------------------------------------------------------------------------------------------------------------------------------------------------------------------------------------------------------------------------------------------------------------------------------------------------------------------------------------------------------------------------------------------------------------------------------------------------------------------------|-----------------------------------------------------------------|-----|--|
| VHC_00                      | <p>Hello. My name is _____, and I'm working with Amref study on covid 19 vaccine hesitancy. We are talking with community members/health care workers/HEWs to better understand vaccine hesitancy, and I would like to invite you to participate. Before we proceed, I would like to ask you a few questions to confirm your consent to participate. Your opinion will help all concerned bodies to improve covid 19 vaccination coverage. I would like to ask you a few questions about your knowledge, perceptions and vaccination experiences. I will also ask you a few questions about your age, marital status, religion, and education level. Your name will not be recorded on any forms, and the information you provide us will be kept confidential. We will not share your individual responses with any members of the health care staff at this site. The interview will last approximately 15 minutes, and we will go to a private place to conduct the interview. Your participation is voluntary, and whether or not you participate will not affect any future care you receive. Some of the questions I ask might make you uncomfortable please remember that you may refuse to answer any questions or stop the interview for any reason. If during or after the interview you would like emotional, clinical or any type of professional support, I will provide you with the contact information for someone that you can contact, if you so desire. You will not get any special benefit because of your participation.</p> |                                                                 |     |  |
| VHC_01                      | Do you agree to complete this interview?                                                                                                                                                                                                                                                                                                                                                                                                                                                                                                                                                                                                                                                                                                                                                                                                                                                                                                                                                                                                                                                                                                                                                                                                                                                                                                                                                                                                                                                                                                           | <input type="checkbox"/> 1 Yes<br><input type="checkbox"/> 2 No | end |  |

| Section 2. General information               |                            |                                                                                                |              |
|----------------------------------------------|----------------------------|------------------------------------------------------------------------------------------------|--------------|
| VHS_02                                       | Region                     | 1. Addis Ababa<br>2. Amhara<br>3. Oromia<br>4. Sidama                                          |              |
| VHS_03                                       | City/Sub-city              | 1. Gulelie<br>2. Yeka<br>3. Bahir Dar<br>4. Debre Birhan<br>5. Adama<br>6. Zeway<br>7. Hawassa |              |
| VHS_04                                       | District name/kebele       | _____                                                                                          |              |
| VHS_05                                       | Date of interview (GC)     | _____                                                                                          |              |
| VHS_06                                       | Name of the data collector | _____                                                                                          |              |
| Section 3. Socio-demographic characteristics |                            |                                                                                                |              |
| No.                                          | Item                       | Response Options                                                                               | Skip Pattern |
| VHS_07                                       | Age of respondent in years | _____ years                                                                                    |              |

|        |                                                             |                                                                                                                                                         |  |
|--------|-------------------------------------------------------------|---------------------------------------------------------------------------------------------------------------------------------------------------------|--|
| VHS_08 | Sex of respondents                                          | 1. Male<br>2. Female                                                                                                                                    |  |
| VHS_09 | Religious status of respondent                              | 1. Orthodox<br>2. Muslim<br>3. Protestant<br>4. Catholic<br>5. Other (specify ____)                                                                     |  |
| VHS_10 | Educational status of respondent                            | 1. Can't read and write<br>2. Read and write only<br>3. Primary school (1-8 grade)<br>4. Secondary school (9-12 grade)<br>5. Certificate and above      |  |
| VHS_11 | Occupation of respondents                                   | 1. Merchant<br>2. Housewife<br>3. Government employed<br>4. Private sector employed<br>5. Student<br>6. No job<br>7. Farmer<br>8. Other (specify ____)  |  |
| VHS_12 | Marital status of respondents                               | 1. Married<br>2. Single<br>3. Divorced<br>4. Widowed                                                                                                    |  |
| VHS_13 | If the respondent is married, educational status of partner | 1. Can't read and write<br>2. Read and write only<br>3. Primary school (1-8 grade)<br>4. Secondary school (9-12 grade)<br>5. Certificate and above      |  |
| VHS_14 | If the respondent is married occupation of partner          | 1. Merchant<br>2. House wife<br>3. Government employed<br>4. Private sector employed<br>5. Student<br>6. No job<br>7. Farmer<br>8. Other (specify ____) |  |
| VHS_15 | Family Size                                                 | _____ in number                                                                                                                                         |  |
| VHS-16 | Average family income (Monthly)                             | -----                                                                                                                                                   |  |
| VHS-17 | Average monthly expenditure (Monthly)                       | -----                                                                                                                                                   |  |

| Section 4. Wealth status indicator |                                           |                  |              |
|------------------------------------|-------------------------------------------|------------------|--------------|
| No.                                | Item                                      | Response Options | Skip Pattern |
| VHS_18                             | Does your household have electricity?     | 1. Yes<br>2. No  |              |
| VHS_19                             | Does your household have radio?           | 1. Yes<br>2. No  |              |
| VHS_20                             | Does your household have television?      | 1. Yes<br>2. No  |              |
| VHS_21                             | Does your household have a refrigerator?? | 1. Yes           |              |

|        |                                                                          |                                                                                                                    |  |
|--------|--------------------------------------------------------------------------|--------------------------------------------------------------------------------------------------------------------|--|
|        |                                                                          | 2. No                                                                                                              |  |
| VHS_22 | Does your household have electric mitad?                                 | 1. Yes<br>2. No                                                                                                    |  |
| VHS_23 | Does your household have table?                                          | 1. Yes<br>2. No                                                                                                    |  |
| VHS_24 | Does your household have chair?                                          | 1. Yes<br>2. No                                                                                                    |  |
| VHS_25 | Does your household have bed with cotton?                                | 1. Yes<br>2. No                                                                                                    |  |
| VHS_26 | Does any member of this household have a bank account?                   | 1. Yes<br>2. No                                                                                                    |  |
| VHS_27 | What is the main source of drinking water for members of your household? | 1. Piped to yard / plot<br>2. Other                                                                                |  |
| VHS_28 | What kind of toilet facility do members of your household usually use?   | 1. Flushed latrine/Pit latrine without slab / open pit<br>2. No facility / bush / field<br>3. Other specify: ..... |  |
| VHS_29 | What type of fuel does your household mainly use for cooking?            | 1. Electric city<br>2. Wood/Charcoal<br>3. Other specify: _____                                                    |  |
| VHS_30 | What is the main material of the floor in your household?                | 1. Earth/sand<br>2. Other                                                                                          |  |
| VHS_31 | What is the main material of the exterior walls in your household?       | 1. Mud<br>2. Cement<br>3. Other specify:                                                                           |  |
| VHS_32 | What is the main material of the roof in your household?                 | 1. Metal / corrugated iron<br>2. Other                                                                             |  |
| VHS_33 | Does the household member have vehicle?                                  | 1. Yes<br>2. No                                                                                                    |  |
| VHS_34 | Does the household member have motor bicycle?                            | 1. Yes<br>2. No                                                                                                    |  |
| VHS_35 | Does the household member have bicycle?                                  | 1. Yes<br>2. No                                                                                                    |  |

| Section 5: KAP assessment questions                       |                                             |                                                                                                                                                                                                                                                                           |              |
|-----------------------------------------------------------|---------------------------------------------|---------------------------------------------------------------------------------------------------------------------------------------------------------------------------------------------------------------------------------------------------------------------------|--------------|
| Section 5.1: Knowledge on covid 19 prevention and control |                                             |                                                                                                                                                                                                                                                                           |              |
| No.                                                       | Item                                        | 1. Response Options                                                                                                                                                                                                                                                       | Skip Pattern |
| VHS_36                                                    | What are the sign and symptoms of Covid-19? | 2. Cough / sneezing / congestion / sore throat<br>3. Fever<br>4. Headache<br>5. Shortness of breath and difficulty breathing / chest pain<br>6. Muscle aches and / or joint pain /general body weakness<br>7. Symptoms of GI (diarrhea, nausea, vomiting, abdominal pain) |              |

|                                                                 |                                                                                                                                 |                                                                                                                                                                                                                                                                                                                                                                 |  |
|-----------------------------------------------------------------|---------------------------------------------------------------------------------------------------------------------------------|-----------------------------------------------------------------------------------------------------------------------------------------------------------------------------------------------------------------------------------------------------------------------------------------------------------------------------------------------------------------|--|
|                                                                 |                                                                                                                                 | 8. Loss of smell and / or taste<br>9. Other specify.....<br>10. I do not know                                                                                                                                                                                                                                                                                   |  |
| VHS_37                                                          | Covid 19 may not also show symptoms                                                                                             | 1. Yes<br>2. No                                                                                                                                                                                                                                                                                                                                                 |  |
| VHS_38                                                          | What are Covid-19 transmission methods?                                                                                         | 1. Direct contact with persons affected by Covid-19<br>2. Touching things<br>3. Airborne<br>4. Other specify .....<br>5. 5. I do not know                                                                                                                                                                                                                       |  |
| VHS_39                                                          | Who is at risk for severe CVD-19 infection?                                                                                     | 1. People aged 65 years of age and older<br>2. People with non-communicable diseases<br>3. People with known respiratory diseases<br>4. Other specify .....<br>5. 5. I do not know                                                                                                                                                                              |  |
| VHS_40                                                          | Covid 19 can be spread by an infected person without symptom                                                                    | 1. Yes<br>2. No                                                                                                                                                                                                                                                                                                                                                 |  |
| VHS_41                                                          | Covid 19 can be transmitted by respiratory droplets of infected person                                                          | 1. Yes<br>2. No                                                                                                                                                                                                                                                                                                                                                 |  |
| VHS_42                                                          | Covid 19 can be spread by the dead bodies of the infected person                                                                | 1. Yes<br>2. No                                                                                                                                                                                                                                                                                                                                                 |  |
| VHS_43                                                          | Avoiding going to crowded places can be prevent contacting Covid 19                                                             | 1. Yes<br>2. No                                                                                                                                                                                                                                                                                                                                                 |  |
| VHS_44                                                          | Avoiding travelling across cities can prevent contracting Covid 19                                                              | 1. Yes<br>2. No                                                                                                                                                                                                                                                                                                                                                 |  |
| VHS_45                                                          | Isolation of infected persons can prevent contracting covid 19                                                                  | 1. Yes<br>2. No                                                                                                                                                                                                                                                                                                                                                 |  |
| VHS_46                                                          | What are the methods you know to prevent covid 19?<br>NB: Multiple response is possible                                         | 1. Wash hands regularly using soap and water<br>2. Wearing masks<br>3. Physical distancing<br>4. Clean with sanitizer<br>5. Getting vaccination<br>6. Avoid close contact with anyone who has a fever and cough<br>7. Stay at home<br>8. Cover mouth and nose when coughing or sneezing<br>9. Avoid direct contact with surfaces<br>10. Cook meat and eggs well |  |
| <b>Section 5.2: Attitude on covid 19 prevention and control</b> |                                                                                                                                 |                                                                                                                                                                                                                                                                                                                                                                 |  |
| VHS_47                                                          | Handling covid 19 will be more difficult if people or other community not keeping up with the information related to prevention | 1. Agree<br>2. Don't know<br>3. Disagree                                                                                                                                                                                                                                                                                                                        |  |

|        |                                                                                                                                                                        |                                          |  |
|--------|------------------------------------------------------------------------------------------------------------------------------------------------------------------------|------------------------------------------|--|
| VHS_48 | Handling covid 19 will be more difficult if people or other community no longer need to worry about contracting covid 19                                               | 1. Agree<br>2. Don't know<br>3. Disagree |  |
| VHS_49 | Handling covid 19 will be more difficult if people or other community influence be negative news                                                                       | 1. Agree<br>2. Don't know<br>3. Disagree |  |
| VHS_50 | I feel that the reason experiencing a symptom or persons infected should compliance the protocol such as wearing mask                                                  | 1. Agree<br>2. Don't know<br>3. Disagree |  |
| VHS_51 | I feel that person experiencing the symptoms or persons infected should be motivated to increasing implement covid 19 prevention measures and ensuring a healthy life. | 1. Agree<br>2. Don't know<br>3. Disagree |  |
| VHS_52 | I feel covid 19 is Government or media propaganda                                                                                                                      | 1. Agree<br>2. Don't know<br>3. Disagree |  |
| VHS_53 | I feel covid 19 is a curse                                                                                                                                             | 1. Agree<br>2. Don't know<br>3. Disagree |  |

#### Section 5.3: Practice on covid 19 prevention and control

|        |                                                                                                               |                                       |  |
|--------|---------------------------------------------------------------------------------------------------------------|---------------------------------------|--|
| VHS_54 | Do you wear a mask in crowded or public places                                                                | 1. Never<br>2. Some times<br>3. Often |  |
| VHS_55 | Do you keep distance between (physical distance) in crowded or public places                                  | 1. Never<br>2. Some times<br>3. Often |  |
| VHS_56 | Do you use hand sanitizer and take a bath after going to a crowded or public place                            | 1. Never<br>2. Some times<br>3. Often |  |
| VHS_57 | Do you change your cloths after going to a crowded or public place                                            | 1. Never<br>2. Some times<br>3. Often |  |
| VHS_58 | Do you carry out a campaign to prevent the spread of covid 19 by providing a direct example in daily activity | 1. Never<br>2. Some times<br>3. Often |  |
| VHS_59 | Do you eat fruits and vegetables in the last few days                                                         | 1. Never<br>2. Some times<br>3. Often |  |
| VHS_60 | In the last few days, do you exercise routinely                                                               | 1. Never<br>2. Some times<br>3. Often |  |

### Section 6. Vaccine hesitancy

#### 6.1. Vaccination status

| No.    | Item                                                     | Response Options           | Skip Pattern |
|--------|----------------------------------------------------------|----------------------------|--------------|
| VHS_61 | Have you ever tested for COVID 19?                       | 1. Yes<br>2. No            | → VHS_63     |
| VHS_62 | If yes for the above question, what was the test result? | 1. Positive<br>2. Negative |              |

|                                             |                                                                                                                                                          |                                                                                                                                                                                                                                               |  |
|---------------------------------------------|----------------------------------------------------------------------------------------------------------------------------------------------------------|-----------------------------------------------------------------------------------------------------------------------------------------------------------------------------------------------------------------------------------------------|--|
| VHS_63                                      | If no for the above question, why you never tested                                                                                                       | 1. I scared testing<br>2. Because I don't trust the test<br>3. No solution knowing it<br>4. I have never had Covid-19 symptoms<br>5. Others (specify (_____))                                                                                 |  |
| VHS_64                                      | Are you vaccinated against COVID-19 with any of the vaccines available?                                                                                  | 1. Yes _____ → 6.1.1<br>2. No _____ → 6.1.2                                                                                                                                                                                                   |  |
| <b>6.1.1. For vaccinated person section</b> |                                                                                                                                                          |                                                                                                                                                                                                                                               |  |
| VHS_65                                      | What was the reason to take the vaccine?                                                                                                                 | 1. I am old<br>2. I have comorbidity<br>3. I am too vulnerable<br>4. Covid-19 vaccine campaign/promotion<br>5. Other (specify____)                                                                                                            |  |
| VHS_66                                      | Which of the vaccines did you receive?                                                                                                                   | 1. Oxford, Astra Zeneca<br>2. Johnson & Johnson<br>3. BioNTech, Pfizer<br>4. Moderna Abdala/Soberana (Cuban)<br>5. Can't recall                                                                                                               |  |
| VHS_67                                      | Which dose you take?<br><i>NB: Depending the type of vaccines ask the round</i>                                                                          | 1. First<br>2. Second<br>3. Third/Booster                                                                                                                                                                                                     |  |
| VHS_68                                      | When you vaccinated the recent vaccine?                                                                                                                  | _____months _____years                                                                                                                                                                                                                        |  |
| VHS_69                                      | Where you vaccinated?                                                                                                                                    | 1. Health facility<br>2. Campaign site                                                                                                                                                                                                        |  |
| VHS_70                                      | Did you feel any adverse effect/s?                                                                                                                       | 1. Yes _____<br>2. No _____ → VHS_72                                                                                                                                                                                                          |  |
| VHS_71                                      | If yes, what was the feeling/s of adverse effect/s                                                                                                       | 1. Pain, redness or swelling at injection site<br>2. Fever<br>3. Fatigue<br>4. Headache<br>5. Muscle pain<br>6. Chills<br>7. Joint pain<br>8. Nausea and vomiting<br>9. Swollen lymph nodes<br>10. Feeling unwell<br>11. Other specify: ----- |  |
| VHS_72                                      | Did you choose your vaccination type, or did you just take what was available at the time?                                                               | 1. 1.Chose my preferred vaccine<br>2. Took what was available                                                                                                                                                                                 |  |
| VHS_73                                      | When you took the vaccine, were u given the detail information about the vaccines- type, possible immediate adverse effect...?                           | 1. Yes<br>2. Yes, but not satisfied as the information was not detail<br>3. No                                                                                                                                                                |  |
| VHS_74                                      | If you choose- was your choice of vaccination based on medical advice or your own enquiry/investigation?<br><br><i>NB: multiple response is possible</i> | 1. Personal enquiry/investigation<br>2. Medical advice<br>3. Other (specify....)                                                                                                                                                              |  |

|        |                                                                                                                                            |                                                                                                                                                                                                                                                                                                                                                                                                                                                                                                                                                                                                                                                                                                                            |              |
|--------|--------------------------------------------------------------------------------------------------------------------------------------------|----------------------------------------------------------------------------------------------------------------------------------------------------------------------------------------------------------------------------------------------------------------------------------------------------------------------------------------------------------------------------------------------------------------------------------------------------------------------------------------------------------------------------------------------------------------------------------------------------------------------------------------------------------------------------------------------------------------------------|--------------|
| VHS_75 | Were you initially hesitant to take the vaccine?                                                                                           | 1. Yes, I was totally hesitant<br>2. Yes, to some extent I was hesitant<br>3. No → VHS_77                                                                                                                                                                                                                                                                                                                                                                                                                                                                                                                                                                                                                                  |              |
| VHS_76 | If you were hesitant, please explain why you were initially hesitant?<br><br><i>NB: multiple response is possible</i>                      | 1. Not relevant, I was never hesitant<br>2. I did not qualify to receive it before<br>3. I did not like any of the vaccine options available to me<br>4. I had religious grounds for not taking it<br>5. I had a medical condition that barred me from taking it<br>6. I did not trust the government<br>7. I did not trust medical authorities<br>8. I did not trust the vaccines (not safe, developed too quickly, do not know what is in it)<br>9. I was not sure about long-term side effects of the vaccine<br>10. There were bad talks in the community about the vaccination and I was afraid<br>11. Worrying because of vaccine politics                                                                           |              |
| VHS_77 | If you were hesitant, what changed your mind? (Select option that best applies).<br><br><i>NB: multiple response is possible</i>           | 1. Not relevant I was never hesitant<br>2. I was offered a vaccine I was more comfortable with<br>3. I spoke to my doctor<br>4. I did more search<br>5. I consulted family and friends<br>6. My spiritual/religious leader advised me do it<br>7. I was persuaded by government/public health authorities<br>8. I noticed that a personality (public or otherwise) took it<br>9. I was forced by my employer/family members<br>10. I did not have a choice<br>11. I felt more comfortable because several people took it before me<br>12. I was frightened by the increased infections/deaths<br>13. My circumstances changed (such as being pregnant or any other medical or personal factor)<br>14. Other specify: ----- |              |
| VHS_78 | Why do you think the main reason for the community or the people who did not take vaccine?<br><br><i>NB: multiple response is possible</i> | 1. Do not know the vaccine<br>2. Lack of access for the vaccine<br>3. The hesitance/trust about the vaccine<br>4. Many people scared of Side-Effects of the Vaccine<br>5. other specify: -----                                                                                                                                                                                                                                                                                                                                                                                                                                                                                                                             |              |
| VHS_79 | Do you advise all other eligible persons (aged from 18 and above) others to be vaccinated?                                                 | 1. Yes<br>2. No; I don't                                                                                                                                                                                                                                                                                                                                                                                                                                                                                                                                                                                                                                                                                                   |              |
| 6.1.2. | <b>People who have not been vaccinated</b>                                                                                                 |                                                                                                                                                                                                                                                                                                                                                                                                                                                                                                                                                                                                                                                                                                                            |              |
| No.    | Item                                                                                                                                       | Response Options                                                                                                                                                                                                                                                                                                                                                                                                                                                                                                                                                                                                                                                                                                           | Skip Pattern |

|        |                                                                                                                                       |                                                                                                                                                                                                                                                                                                                                                                                                                                                                                                                                                                                                                                                                                                                                                                                                                                                                                                                                                                    |        |
|--------|---------------------------------------------------------------------------------------------------------------------------------------|--------------------------------------------------------------------------------------------------------------------------------------------------------------------------------------------------------------------------------------------------------------------------------------------------------------------------------------------------------------------------------------------------------------------------------------------------------------------------------------------------------------------------------------------------------------------------------------------------------------------------------------------------------------------------------------------------------------------------------------------------------------------------------------------------------------------------------------------------------------------------------------------------------------------------------------------------------------------|--------|
| VHS_80 | Which of these reasons best explains why you are unvaccinated at this time or before?<br><br><i>NB: multiple response is possible</i> | <ol style="list-style-type: none"> <li>1. No access to take vaccine/ I cannot easily find the vaccine</li> <li>2. I did not qualify to receive it</li> <li>3. Can't find the time to go</li> <li>4. Vaccine delivery sites are too distant</li> <li>5. I don't like any of the vaccine options available to me</li> <li>6. I will not take it on religious grounds</li> <li>7. I believe that I have a medical condition that bars me from taking it</li> <li>8. I do not trust the government/medical authorities here</li> <li>9. I do not trust the vaccine (not safe, developed too quickly, do not know what is in it)</li> <li>10. I believe it is a choice and I choose not to vaccinate with no reason</li> <li>11. I won't take it</li> <li>12. I am doubtful about long-term side effects of the vaccine</li> <li>13. It is not mandatory for my work</li> <li>14. No need to take since it will not protect</li> <li>15. Other specify -----</li> </ol> |        |
| VHS_81 | Have you a plan to be vaccinated?                                                                                                     | <ol style="list-style-type: none"> <li>1. Yes</li> <li>2. No</li> </ol>                                                                                                                                                                                                                                                                                                                                                                                                                                                                                                                                                                                                                                                                                                                                                                                                                                                                                            | VHS_83 |
| VHS_82 | If yes, which vaccine do you prefer?                                                                                                  | <ol style="list-style-type: none"> <li>1. Oxford, AstraZeneca</li> <li>2. Johnson &amp; Johnson</li> <li>3. BioNTech, Pfizer</li> <li>4. Moderna Abdala/Soberana (Cuban)</li> <li>5. Any as I do not have any detail information</li> <li>6. Any as all vaccines work</li> </ol>                                                                                                                                                                                                                                                                                                                                                                                                                                                                                                                                                                                                                                                                                   |        |
| VHS_83 | If "No" for VHS_80, why you never tested?                                                                                             | <ol style="list-style-type: none"> <li>1. I scared testing before the vaccine</li> <li>2. I have never had Covid-19 symptoms</li> <li>3. I was sick for COVID 19 and I will never be reinfected</li> <li>4. Others specify: -----</li> </ol>                                                                                                                                                                                                                                                                                                                                                                                                                                                                                                                                                                                                                                                                                                                       |        |
| VHS_84 | Has your view on the COVID-19 vaccination always been the same or has it changed over time?                                           | <ol style="list-style-type: none"> <li>1. No change- I still am not going to take it</li> <li>2. I am now more inclined towards taking it</li> <li>3. I am now less inclined towards taking it</li> </ol>                                                                                                                                                                                                                                                                                                                                                                                                                                                                                                                                                                                                                                                                                                                                                          |        |
| VHS_85 | Why do you think the main reason for the community did not taking vaccine?                                                            | <ol style="list-style-type: none"> <li>1. Do not know the vaccine</li> <li>2. Lack of access for the vaccine</li> <li>3. The hesitance/trust about the vaccine</li> <li>4. Many people scared of Side-Effects of the Vaccine</li> <li>5. other specify: -----</li> </ol>                                                                                                                                                                                                                                                                                                                                                                                                                                                                                                                                                                                                                                                                                           |        |
| VHS_86 | Would persuade you to change your mind and take the COVID-19 Vaccine because of?<br><br><i>NB: multiple response is possible</i>      | <ol style="list-style-type: none"> <li>1. If it were necessary for me to secure or maintain a job</li> <li>2. If it would allow me to access social activities more freely</li> <li>3. If I was given more scientific or medical information</li> </ol>                                                                                                                                                                                                                                                                                                                                                                                                                                                                                                                                                                                                                                                                                                            |        |



|                                                             |                                                                                                                                                               |                                                                                                                                                                                                                                                                                                                                                                                                                                                                                                          |  |
|-------------------------------------------------------------|---------------------------------------------------------------------------------------------------------------------------------------------------------------|----------------------------------------------------------------------------------------------------------------------------------------------------------------------------------------------------------------------------------------------------------------------------------------------------------------------------------------------------------------------------------------------------------------------------------------------------------------------------------------------------------|--|
|                                                             |                                                                                                                                                               | 4. If I saw people, I care about getting sick/dying from COVID-19<br>5. If I saw influential people who now oppose it switch their position<br>6. If it was required for me to travel overseas<br>7. Other reason (Specify) _____                                                                                                                                                                                                                                                                        |  |
| VHS_87                                                      | If you were to choose between expanding the level of vaccination in the country and prolonged restrictions, which would you prefer?                           | 1. Increase vaccination levels<br>2. Continue restrictions                                                                                                                                                                                                                                                                                                                                                                                                                                               |  |
| VHS_88                                                      | Apart from vaccinations, what do you think of these other options for combating COVID-19:                                                                     | 1. No need for any options, COVID-19 is a hoax<br>2. Natural immunity (let the vulnerable get sick and the rest of us get on with life)<br>3. Comprehensive lockdowns<br>4. More hand washing<br>5. Regular face mask use<br>6. Better social distancing<br>7. Other specify -----                                                                                                                                                                                                                       |  |
| VHS_89                                                      | For who would you support the implementation of COVID-19 vaccine mandates?<br><br><i>NB: multiple response is possible</i>                                    | 1. New visitors<br>2. Frontline medical/Elder care workers<br>3. Public servants<br>4. Workers in the Hotel/Tourism sector<br>5. Taxi/Minibus drivers and conductors<br>6. Secondary/Tertiary school teachers and students<br>7. Other (specify-----)                                                                                                                                                                                                                                                    |  |
| <b>Section 7: Primary and Trusted Source of information</b> |                                                                                                                                                               |                                                                                                                                                                                                                                                                                                                                                                                                                                                                                                          |  |
| VHS_90                                                      | What is your PRIMARY source of information on the COVID-19 vaccine situation?<br><br><i>NB: multiple response is possible</i>                                 | 1. Government/Official sources including HCWs, HEWs<br>2. Printed/posted materials- leaflet, billboard,<br>3. Private/personal medical sources<br>4. Social media (Facebook/Instagram/WhatsApp/Twitter/TikTok/YouTube)<br>5. Personal internet research (via Google, Safari, Bing, Yahoo, Baidu, AOL, Ask.com, Excite)<br>6. Local radio/television/newspapers<br>7. Information from family and friends<br>8. Religious leaders                                                                         |  |
| VHS_91                                                      | Specifically, what type of information on the COVID-19 Vaccine would help you to be more inclined to take it?<br><br><i>NB: multiple response is possible</i> | 1. The side effects of the vaccine<br>2. How much the vaccine is effective?<br>3. The numbers of people who got sick/died and their vaccination status<br>4. The different types of available vaccines<br>5. Location of vaccination sites<br>6. The attitude of my religion or religious leaders<br>7. Getting clear information about the misconceptions you hear about the vaccine<br>8. The impact of the vaccine on my sexual health<br>9. The impact of the vaccine on my ability to have children |  |

|        |                                                                                                                                                           |                                                                                                                                                                                                                                                                                                                                                                                                                                                            |  |
|--------|-----------------------------------------------------------------------------------------------------------------------------------------------------------|------------------------------------------------------------------------------------------------------------------------------------------------------------------------------------------------------------------------------------------------------------------------------------------------------------------------------------------------------------------------------------------------------------------------------------------------------------|--|
|        |                                                                                                                                                           | 10. Other information (specify)                                                                                                                                                                                                                                                                                                                                                                                                                            |  |
| VHS_92 | Have you ever consulted a medical advice?                                                                                                                 | 1. Yes, I consulted<br>2. No, I did not consult<br>3. Medical advice was irrelevant in my case                                                                                                                                                                                                                                                                                                                                                             |  |
| VHS_93 | What is your TURSTED source of information on the COVID-19 vaccine situation?<br><br><i>NB: multiple response is possible</i>                             | 1. Government/Official sources including HCWs, HEWs<br>2. Printed/posted materials- leaflet, billboard,<br>3. Private/personal medical sources<br>4. Social media (Facebook/Instagram/WhatsApp/Twitter/TikTok/YouTube)<br>5. Personal internet research (via Google, Safari, Bing, Yahoo, Baidu, AOL, Ask.com, Excite)<br>6. Local radio/television/newspapers<br>7. Information from family and friends<br>8. Religious leaders<br>9. Other (specify____) |  |
| VHS_94 | What is the best way to communicate with you or the way that you generally prefer to receive information?<br><br><i>NB: multiple response is possible</i> | 1. Via newspapers (paper/electronic)<br>2. Via radio<br>3. Via television (local or cable)<br>4. Via Facebook<br>5. Via Instagram<br>6. Via WhatsApp<br>7. Via Twitter<br>8. Via TikTok<br>9. Via YouTube<br>10. Social networks (family and friends)<br>11. Other (specify____)                                                                                                                                                                           |  |
| VHS_95 | What is the best day to get in touch with you or to receive information?<br><i>NB: multiple response is possible</i>                                      | 1. Monday<br>2. Tuesday<br>3. Wednesday<br>4. Thursday<br>5. Friday<br>6. Saturday<br>7. Sunday                                                                                                                                                                                                                                                                                                                                                            |  |
| VHS_96 | What time you usually prefer to get information in a typical day?<br><br><i>NB: multiple response is possible</i>                                         | 1. Morning<br>2. Mid-day- during lunch<br>3. Afternoon<br>4. Late evening                                                                                                                                                                                                                                                                                                                                                                                  |  |

| Section 9. actors for covid 19 vaccine hesitancy |                                       |                                                                                    |              |
|--------------------------------------------------|---------------------------------------|------------------------------------------------------------------------------------|--------------|
| i. Perceived susceptibility to covid -19         |                                       |                                                                                    |              |
| No                                               | Item                                  | Response Options                                                                   | Skip Pattern |
| VHS_97                                           | It is likely that I will get COVID-19 | 1. Strongly disagree<br>2. Disagree<br>3. Neutral<br>4. Agree<br>5. Strongly agree |              |
| VHS_98                                           | I am at risk of getting COVID-19      | 1. Strongly disagree<br>2. Disagree                                                |              |

|                                                                |                                                                                        |                                                                                    |  |
|----------------------------------------------------------------|----------------------------------------------------------------------------------------|------------------------------------------------------------------------------------|--|
|                                                                |                                                                                        | 3. Neutral<br>4. Agree<br>5. Strongly agree                                        |  |
| VHS_99                                                         | It is possible that I will get COVID-19.                                               | 1. Strongly disagree<br>2. Disagree<br>3. Neutral<br>4. Agree<br>5. Strongly agree |  |
| VHS_100                                                        | I think I infected by Covid-19 and get cured though I am not formally diagnosed/tested | 1. Strongly disagree<br>2. Disagree<br>3. Neutral<br>4. Agree<br>5. Strongly agree |  |
| <b>ii. Perceived severity of COVID-19</b>                      |                                                                                        |                                                                                    |  |
| VHS_101                                                        | I believe that COVID-19 is a severe health problem                                     | 1. Strongly disagree<br>2. Disagree<br>3. Neutral<br>4. Agree<br>5. Strongly agree |  |
| VHS_102                                                        | I Believe that COVID-19 has serious negative consequences.                             | 1. Strongly disagree<br>2. Disagree<br>3. Neutral<br>4. Agree<br>5. Strongly agree |  |
| VHS_103                                                        | I believe that COVID-19 is extremely harmful.                                          | 1. Strongly disagree<br>2. Disagree<br>3. Neutral<br>4. Agree<br>5. Strongly agree |  |
| <b>iii. Perceived individual benefits of COVID-19 vaccines</b> |                                                                                        |                                                                                    |  |
| VHS_104                                                        | COVID-19 vaccines will work in preventing the disease                                  | 1. Strongly disagree<br>2. Disagree<br>3. Neutral<br>4. Agree<br>5. Strongly agree |  |
| VHS_105                                                        | If I get the vaccines, I will be less likely to get severe form of COVID-19            | 1. Strongly disagree<br>2. Disagree<br>3. Neutral<br>4. Agree<br>5. Strongly agree |  |
| VHS_106                                                        | If I get the vaccines, I will be less likely to get COVID-19 disease                   | 1. Strongly disagree<br>2. Disagree<br>3. Neutral<br>4. Agree<br>5. Strongly agree |  |
| <b>iv. Perceived community benefits of COVID-19 vaccines</b>   |                                                                                        |                                                                                    |  |

|                                                                                                                                                                             |                                                                                                    |                                                                                    |  |
|-----------------------------------------------------------------------------------------------------------------------------------------------------------------------------|----------------------------------------------------------------------------------------------------|------------------------------------------------------------------------------------|--|
| VHS_107                                                                                                                                                                     | Having myself vaccinated against COVID-19 is beneficial for the health of others in the community? | 1.Strongly disagree<br>2.Disagree<br>3.Neutral<br>4.Agree<br>5.Strongly agree      |  |
| VHS_108                                                                                                                                                                     | COVID-19 vaccines protect the health of the community?                                             | 1.Strongly disagree<br>2.Disagree<br>3.Neutral<br>4.Agree<br>5.Strongly agree      |  |
| <b>v. Perceived barriers of getting COVID-19 vaccines (safety and cost concerns).</b> How much would the following factors prevent you from getting vaccinated for COVID-19 |                                                                                                    |                                                                                    |  |
| VHS_109                                                                                                                                                                     | Concerns about whether COVID-19 vaccines are safe                                                  | 1. Strongly disagree<br>2. Disagree<br>3. Neutral<br>4. Agree<br>5. Strongly agree |  |
| VHS_110                                                                                                                                                                     | Not enough research done on COVID-19 vaccines                                                      | 1. Strongly disagree<br>2. Disagree<br>3. Neutral<br>4. Agree<br>5. Strongly agree |  |
| VHS_111                                                                                                                                                                     | I have concerns about possible side effects of COVID-19 vaccines                                   | 1. Strongly disagree<br>2. Disagree<br>3. Neutral<br>4. Agree<br>5. Strongly agree |  |
| <b>vi. Self-efficacy about covid 19 vaccine</b>                                                                                                                             |                                                                                                    |                                                                                    |  |
| VHS_112                                                                                                                                                                     | I will be able to take the vaccine to prevent transmitting COVID-19 to others                      | 1.Strongly disagree<br>2.Disagree<br>3.Neutral<br>4.Agree<br>5.Strongly agree      |  |
| VHS_113                                                                                                                                                                     | It will be easy for me to get the vaccines to protect myself from COVID-19                         | 1.Strongly disagree<br>2.Disagree<br>3.Neutral<br>4.Agree<br>5.Strongly agree      |  |
| VHS_114                                                                                                                                                                     | Getting vaccinated to prevent COVID-19 is convenient                                               | 1.Strongly disagree<br>2.Disagree<br>3.Neutral<br>4.Agree<br>5.Strongly agree      |  |
| <b>vii. Cues to action (COVID-19 exposure)</b>                                                                                                                              |                                                                                                    |                                                                                    |  |
| VHS_115                                                                                                                                                                     | Have you experienced any of the following in the past 9 months?                                    | 1. Tested positive for COVID-19 antibody                                           |  |

|                                         |                                                                                                                   |                                                                                                                                                                                                                                                                                                                                                                                                                         |         |
|-----------------------------------------|-------------------------------------------------------------------------------------------------------------------|-------------------------------------------------------------------------------------------------------------------------------------------------------------------------------------------------------------------------------------------------------------------------------------------------------------------------------------------------------------------------------------------------------------------------|---------|
|                                         | <i>NB: multiple response is possible</i>                                                                          | 2. I was hospitalized because of Covid-19<br>3. Family or close friend tested positive for COVID-19<br>4. Someone you knew tested positive for COVID-19<br>5. Exposed to people who have got COVID-19<br>6. Treating patients with COVID-19<br>7. Taking care of someone with COVID-19<br>8. Family or close friend passed away due to COVID-19<br>9. Someone you knew passed away due to COVID-19<br>10. None of above |         |
| VHS_116                                 | Were you an essential worker during the COVID-19 lockdown?                                                        | 1 Yes<br>2 No                                                                                                                                                                                                                                                                                                                                                                                                           | VHS_120 |
| VHS_117                                 | If your response is YES for VHS_116, most people who are like me will get COVID-19 vaccination.                   | 1. Strongly disagree<br>2. Disagree<br>3. Neutral<br>4. Agree<br>5. Strongly agree                                                                                                                                                                                                                                                                                                                                      |         |
| VHS_118                                 | If your response is YES for VHS_116, Most people who are important to me will get COVID-19 vaccination            | 1. Strongly disagree<br>2. Disagree<br>3. Neutral<br>4. Agree<br>5. Strongly agree                                                                                                                                                                                                                                                                                                                                      |         |
| VHS_119                                 | If your response is YES for VHS_116, Most people who are important to me think that I should get COVID-19 vaccine | 1. Strongly disagree<br>2. Disagree<br>3. Neutral<br>4. Agree<br>5. Strongly agree                                                                                                                                                                                                                                                                                                                                      |         |
| VHS_120                                 | How would you feel if you were vaccinated with Covid-19 vaccine?                                                  | 1. Negative<br>2. Positive                                                                                                                                                                                                                                                                                                                                                                                              |         |
| viii. Experience with*past* vaccination |                                                                                                                   |                                                                                                                                                                                                                                                                                                                                                                                                                         |         |
| VHS_121                                 | Have you ever not accepted covid 19 vaccination?                                                                  | 1. Yes<br>2. No                                                                                                                                                                                                                                                                                                                                                                                                         |         |
| VHS_122                                 | Most people tolerate covid 19 vaccination very well                                                               | 1. Strongly disagree<br>2. Disagree<br>3. Neutral<br>4. Agree<br>5. Strongly agree                                                                                                                                                                                                                                                                                                                                      |         |
| VHS_123                                 | Do you know someone who had a bad reaction due to covid 19 vaccinations and that made you not to vaccinate?       | 1. Yes<br>2. No                                                                                                                                                                                                                                                                                                                                                                                                         |         |
| VHS_124                                 | Do you encounter someone with a serious complication or someone who is died because of covid 19 vaccination?      | 1. Yes<br>2. No                                                                                                                                                                                                                                                                                                                                                                                                         |         |

|         |                                                                                               |                 |  |
|---------|-----------------------------------------------------------------------------------------------|-----------------|--|
| VHS_125 | Do you know someone who encountered serious complication or died because of covid 19 disease? | 1. Yes<br>2. No |  |
| VHS_126 | If yes to VHS_124, did this make you to reconsider your decision to get vaccinated?           | 1. Yes<br>2. No |  |
| VHS_127 | Geographical location (GPS)                                                                   | _____           |  |
